# Supplementary material for: Dual airway and alveolar contributions to adult lung homeostasis and carcinogenesis
Source: bioRxiv or medRxiv preprint supplement (doi:10.1101/531780), 2019-01-27
Supplement: Supplementary file [file media-2.pdf]

# SUPPLEMENTARY FIGURE 1

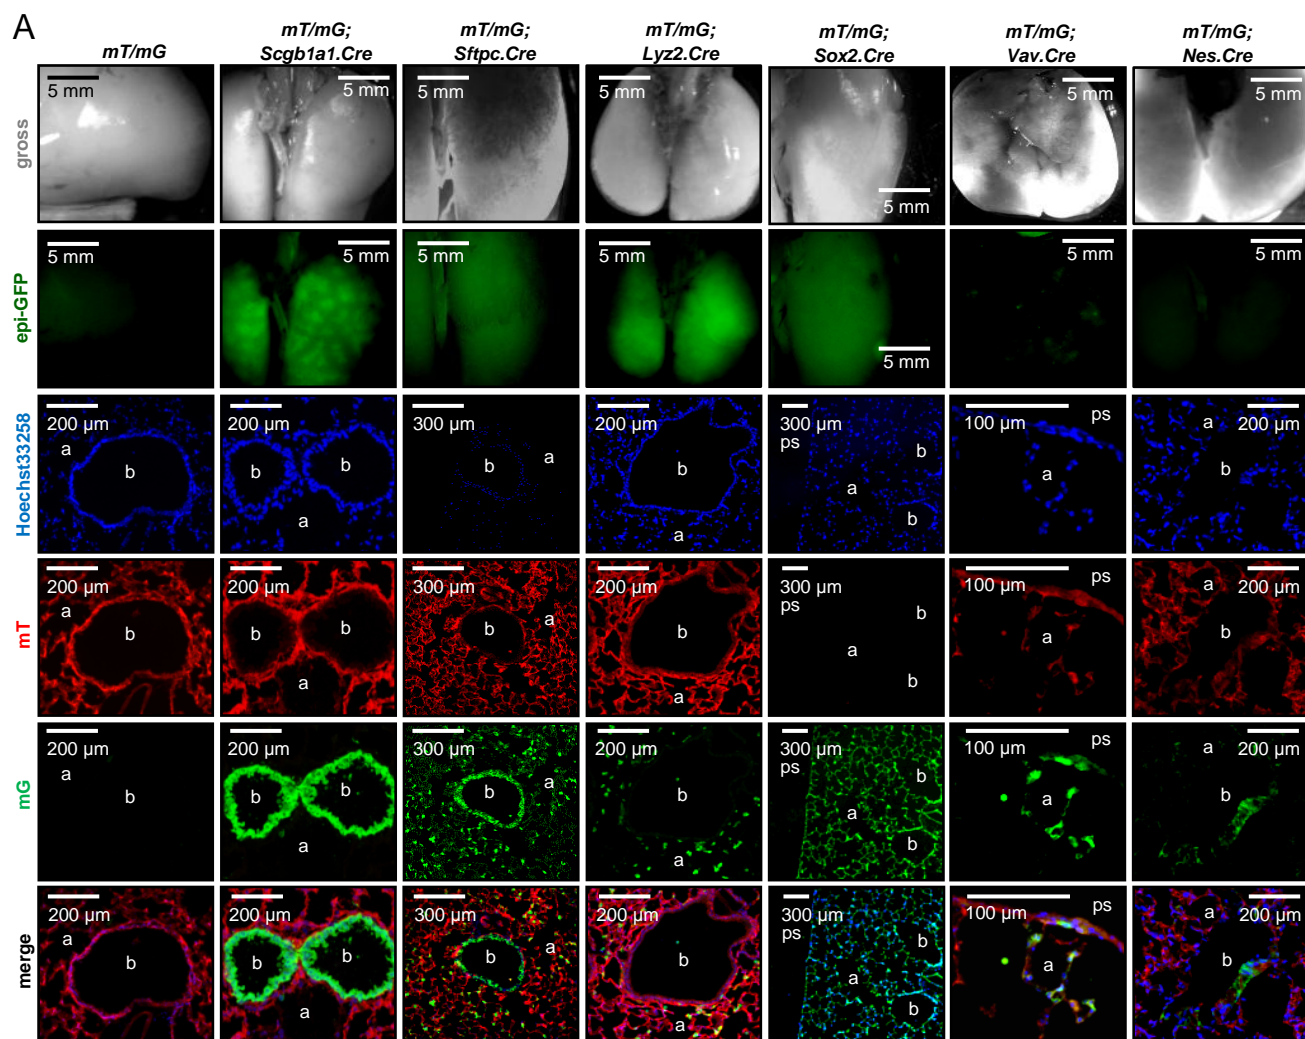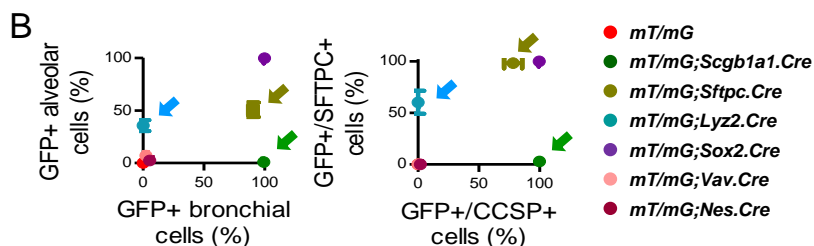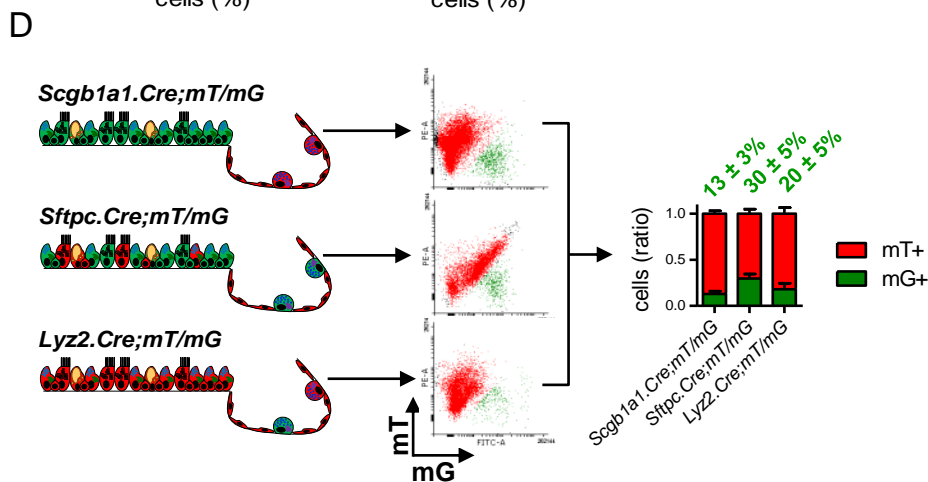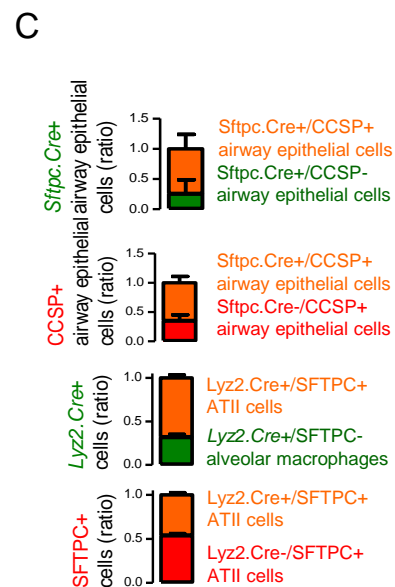

**Supplementary Figure 1.** Mouse models for genetic marking of lung cells. **A**, Lung photographs and green epifluorescence images (top two rows), as well as fluorescent microscopic images of lung sections (Hoechst 33258 stain, endogenous *mT* and *mG* fluorescence, and merged images; bottom four rows) of genetically marked mice employed in these studies at six postnatal weeks ( $n = 5/\text{group}$ ). Note absence of *mG*<sup>+</sup> cells in *mT/mG* and of *mT*<sup>+</sup> cells in *mT/mG;Sox2.Cre* mice, *mG*<sup>+</sup> cells in bronchi (b) but not alveoli (a) of *mTmG;Scgb1a1.Cre* mice, in bronchi and alveoli of *mTmG;Sftpc.Cre* mice, in alveoli of *mTmG;Lyz2.Cre* mice, in alveolar capillaries of *mTmG;Vav.Cre* mice, and in neuroepithelial bodies of *mTmG;Nes.Cre* mice. ps, pleural space. **B**, (Left graph), XY plot of *mG*<sup>+</sup> airway versus alveolar cells from A ( $n = 5/\text{group}$ ). Arrows denote the complete and exclusive *mG*<sup>+</sup> marking of airway but not alveolar cells in *mTmG;Scgb1a1.Cre* mice (green); the exclusive marking of some alveolar but not airway cells in *mTmG;Lyz.Cre* mice (blue arrows); and the promiscuous marking of alveolar and airway cells in *mTmG;Sftpc.Cre* mice (olive). (Right graph), data summary from immunostaining of lung sections of lung-marked mice ( $n = 5/\text{group}$ ) for CCSP and SFTPC shown in Figure 1A: XY plot of ratios of *mG*<sup>+</sup> to CCSP<sup>+</sup> airway versus *mG*<sup>+</sup> to SFTPC<sup>+</sup> alveolar cells. Arrows denote the complete and exclusive *mG*<sup>+</sup> marking of CCSP<sup>+</sup> club cells, but not of alveolar cells in *mTmG;Scgb1a1.Cre* mice (green); the exclusive marking of a fraction of SFTPC<sup>+</sup> ATII cells, but not of airway cells in *mTmG;Lyz.Cre* mice (blue); and the promiscuous marking of *mTmG;Sftpc.Cre* mice (olive). **C**, Quantification of genetic/proteinaceous labeling from immunostains of airways of *mT/mG;Sftpc.Cre* mice ( $n = 5$ ) for Clara cell secretory protein (CCSP, top two graphs) shows that  $75 \pm 24\%$  of *mG*<sup>+</sup> cells are club cells and  $66 \pm 11\%$  of club cells are *mG*<sup>+</sup>, and from immunostains of distal alveolar regions of *mT/mG;Lyz2.Cre* mice ( $n = 5$ ) for SFTPC and LYZ2 (bottom two graphs) that  $68 \pm 3\%$  of *mG*<sup>+</sup> cells are ATII cells and  $32 \pm 3\%$  alveolar macrophages (AMΦ) and that  $47 \pm 4\%$  of ATII cells are *mG*<sup>+</sup>, i.e. from the SFTPC<sup>+</sup>LYZ2<sup>+</sup> lineage. **D**, Schematic representation of genetic marking in *mTmG;Scgb1a1.Cre*, *mTmG;Sftpc.Cre*, and *mTmG;Lyz.Cre* mice (left), flow cytometric gating strategy to quantify *mG*<sup>+</sup> and *mT*<sup>+</sup> cells (middle), and data summary from  $n = 5, 3$ , and 6

mice/group (right). Numbers above columns are mean  $\pm$  SD values of *mG*+ cell percentage/strain.

Data are given as mean  $\pm$  SD. Five non-overlapping fields/sample were examined. *mG*,

membranous green fluorescent protein fluorophore; *mT*, membranous tomato fluorophore.
