# Supplementary material for: Dual airway and alveolar contributions to adult lung homeostasis and carcinogenesis
Source: bioRxiv or medRxiv preprint supplement (doi:10.1101/531780), 2019-01-27
Supplement: Supplementary file [file media-4.pdf]

# SUPPLEMENTARY FIGURE 3

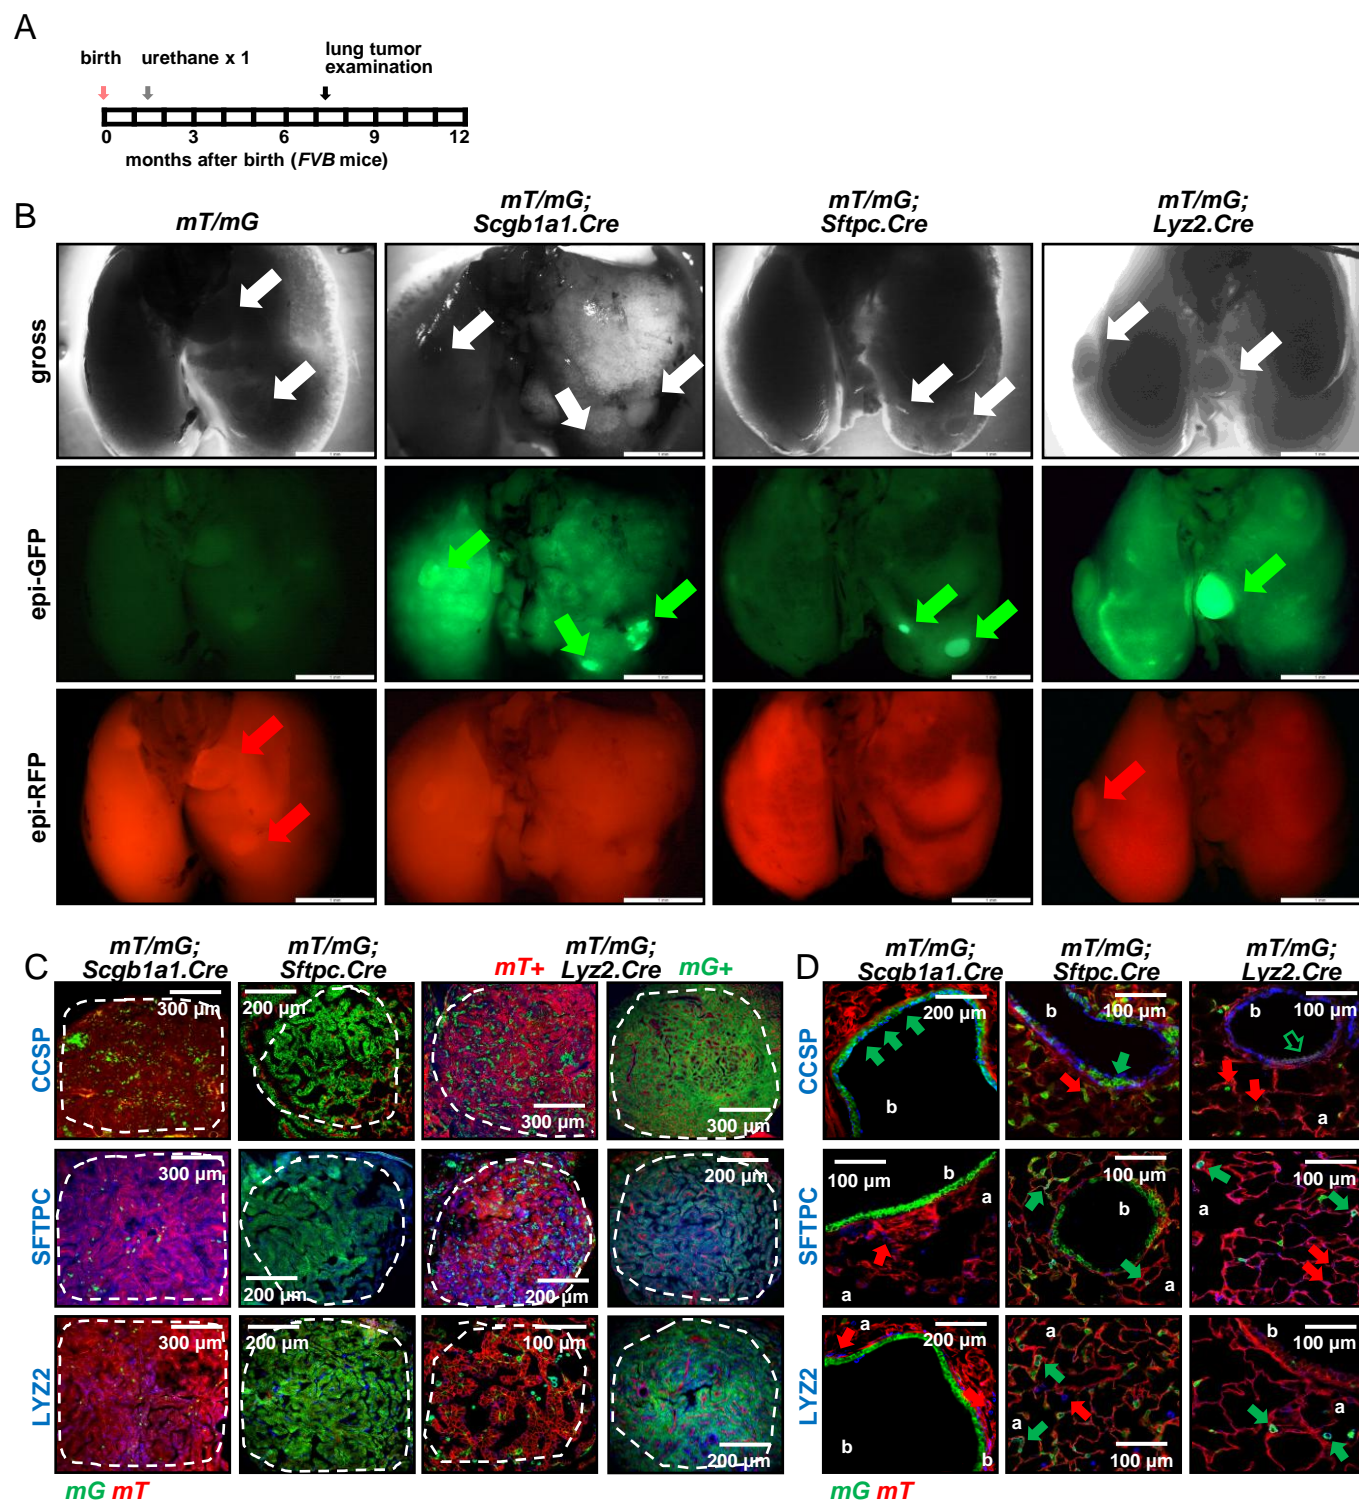

**Supplementary Figure 3.** Lung adenocarcinoma molecular signatures of *FVB* mice. **A**, Schematic of urethane administration in *FVB* mice: one intraperitoneal injection of 1 g/Kg urethane (grey arrow) was administered at six weeks after birth (pink arrow) and lungs were examined six months later (black arrow). **B**, Representative photographs and epifluorescence images of tumor-bearing *mT/mG*, *mT/mG;Scgblal.Cre*, *mT/mG;Sftpc.Cre*, and *mTmG;Lyz2.Cre* *FVB* lungs ( $n \geq 8/\text{group}$ ). Arrows indicate lung tumors. Note the absence of *mG*<sup>+</sup> fluorescence in *mT/mG* tumors, the *mG*<sup>+</sup> fluorescence of *mT/mG;Scgblal.Cre* and *mT/mG;Sftpc.Cre* tumors, and the split *mG*<sup>+</sup> and *mG*<sup>-</sup> tumors of *mTmG;Lyz2.Cre* mice. **C**, Lineage marker protein-stained LUAD (dashed outlines) from genetically-marked mice from D (*FVB*,  $n \geq 10/\text{group}$ ). Note *mG*<sup>+</sup>CCSP-SFTPC+LYZ2 $\pm$  LUAD cells of *mTmG;Scgblal.Cre* mice. **D**, Lineage marker-stained lung sections of 6-week-old lung-marked mice (*FVB*,  $n = 5/\text{group}$ ). Note *mG*<sup>+</sup>CCSP<sup>+</sup> club and *mG*<sup>+</sup>TUBA1A<sup>+</sup> ciliated cells in bronchi (b) of *mT/mG;Scgblal.Cre* mice, *mG*<sup>+</sup>SFTPC+LYZ2 $\pm$  alveolar type II cells and *mG*<sup>+</sup>SFTPC-LYZ2<sup>+</sup> alveolar macrophages in the alveoli (a) of *mT/mG;Lyz2.Cre* mice, and various *mG*<sup>+</sup> cells in bronchi and alveoli of *mT/mG;Sftpc.Cre* mice. Arrows indicate lineage marker protein-expressing *mG*<sup>+</sup> (green) and *mT*<sup>+</sup> (red) cells. Five non-overlapping fields/sample were examined. *mG*, membranous green fluorescent protein fluorophore; *mT*, membranous tomato fluorophore; CCSP, Clara cell secretory protein; SFTPC, surfactant protein C; LYZ2, lysozyme 2.
