# Supplementary material for: Dual airway and alveolar contributions to adult lung homeostasis and carcinogenesis
Source: bioRxiv or medRxiv preprint supplement (doi:10.1101/531780), 2019-01-27
Supplement: Supplementary file [file media-7.pdf]

SUPPLEMENTARY FIGURE 6

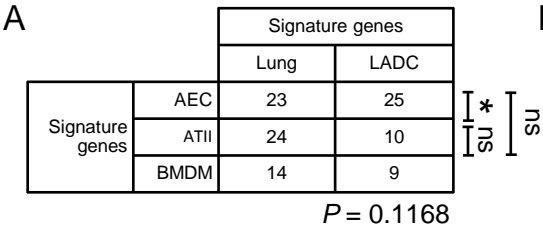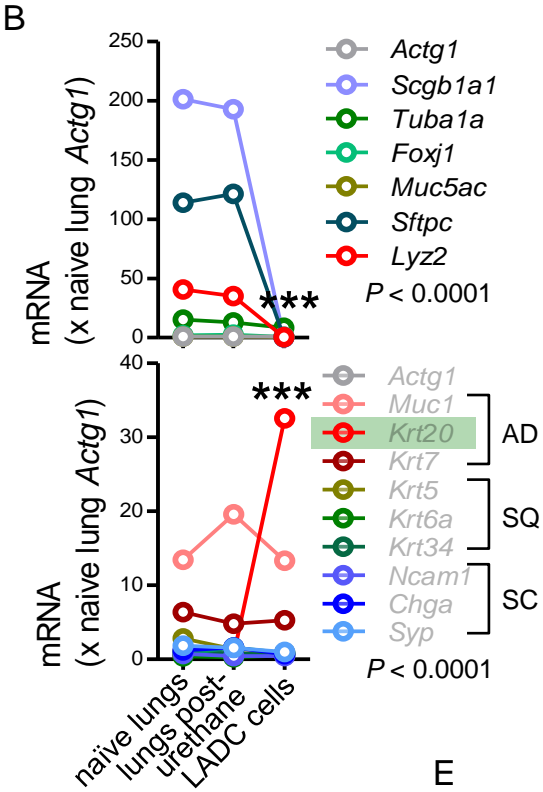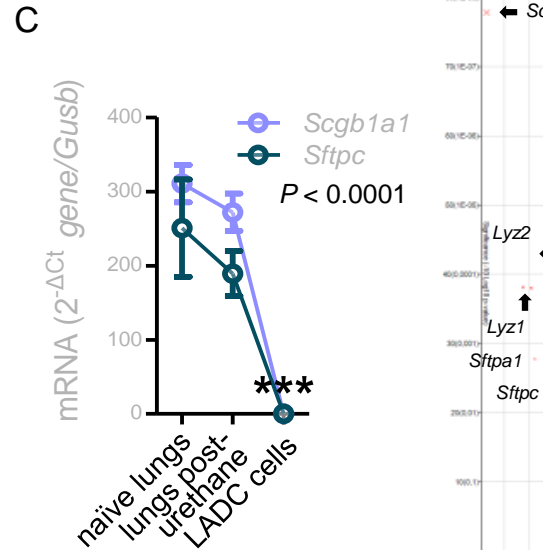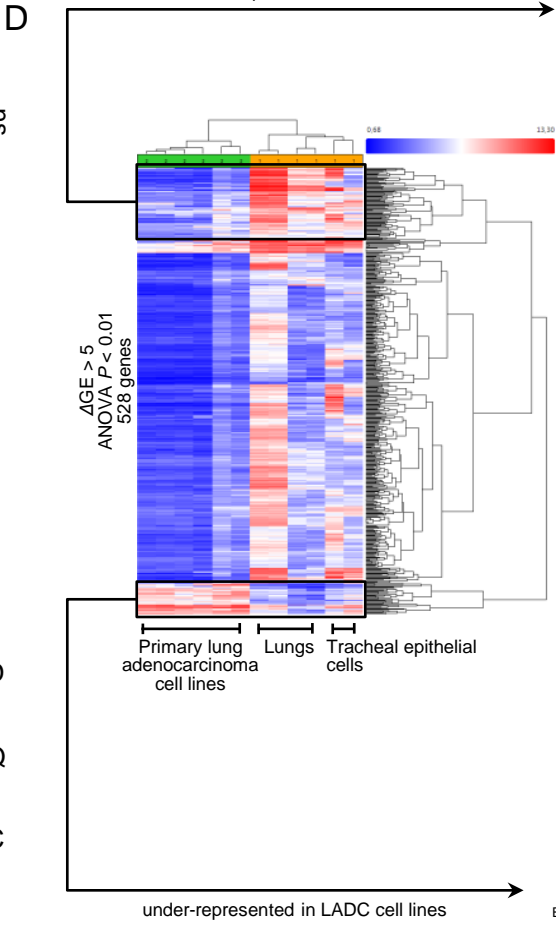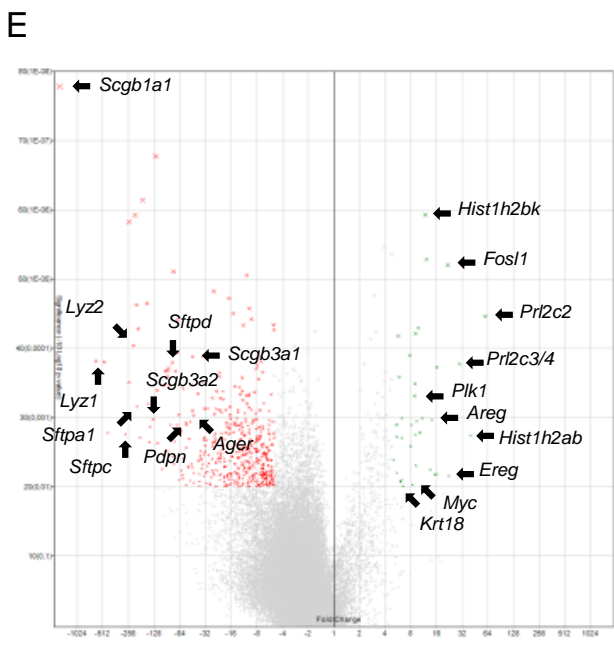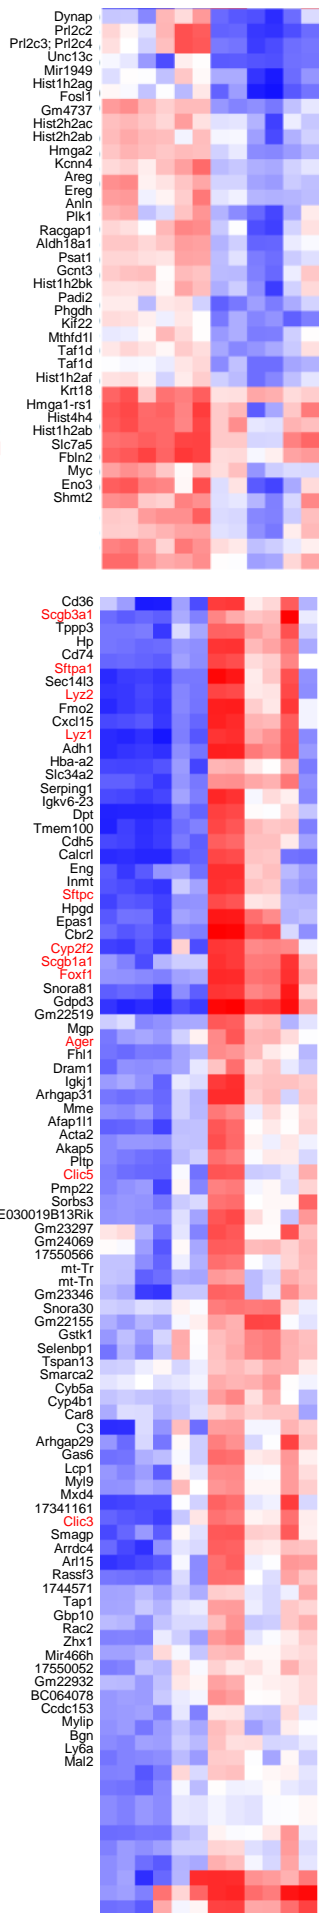

**Supplementary Figure 6.** Transcriptomic characterization of urethane-induced lung

adenocarcinoma (LUAD) cell lines. **A-C**, RNA of mouse urethane-induced LUAD cell lines, lungs obtained pre- and one week post-urethane treatment ( $n = 2$  each), and airway epithelial cells (AEC), alveolar type II cells [ATII; data from [36]], and bone marrow-derived macrophages (BMDM) was examined by Affymetrix Mouse Gene ST2.0 microarrays ( $n = 4$ /group). **A**, Number of genes out of the 30 top-represented transcripts of AEC, ATII, and BMDM within the top-2000-expressed genes of lungs and LUAD cells. **B** and **C**, Mean expression levels of selected transcripts, including lineage markers and markers of histologic subtype in LUAD compared with lungs pre- and one week post-urethane treatment (B, microarray,  $n = 2$ /group; C, qPCR,  $n = 3$ /group). AD, adenocarcinoma; SQ, squamous cell carcinoma; SC, small cell carcinoma. **D** and **E**, Differentially expressed genes between six different lung adenocarcinoma cell lines cultured from urethane-induced lung tumors and six benign respiratory mouse samples, including lungs of saline- and urethane-treated mice obtained at one week post-treatment, as well as primary mouse tracheal epithelial cells. **D**, Whole heat map showing the accurate hierarchical clustering of the samples according to differentially expressed genes, as well as the top over- and under-represented genes. Note the universal loss of expression of lineage markers by lung adenocarcinoma cells (genes in red font). **E**, Volcano plot showing selected top over- and under-represented genes (arrows). ANOVA, analysis of variance; FDR, false discovery rate. Data are given as mean  $\pm$  SD and two-way ANOVA (graphs) or  $\chi^2$  test (table)  $P$  values. ns, \*, and \*\*\*:  $P > 0.05$ ,  $P < 0.05$ , and  $P < 0.001$  for the comparisons indicated (A) or for comparison of all genes (B, D) and of *Krt20* (C) with naïve lungs by Bonferroni post-tests (graphs) or Fischer's exact test (table).
